# Supplementary material for: Lactobacilli Infection Case Reports in the Last Three Years and Safety Implications
Source: MDPI journal article supplement (doi:10.3390/nu14061178), 2022-03-11
Supplement: s1 [file s1]

**Table S1.** Published case reports of infections caused by lactobacilli since 2019 with indication of age of the patient, underlying conditions, species identity of the etiological agent and identification method.

| Type of infection    | Age, sex          | Risk factors                                                                                   | Underlying conditions                                                             | Aethiological agent                             | Reference |
|----------------------|-------------------|------------------------------------------------------------------------------------------------|-----------------------------------------------------------------------------------|-------------------------------------------------|-----------|
| 2019                 |                   |                                                                                                |                                                                                   |                                                 |           |
| Bacteremia           | Neonate           | preterm birth<br>treatment with <i>L. reuteri</i> probiotic                                    |                                                                                   | <i>Limosilactobacillus reuteri</i>              | [20]      |
|                      | 46 male           | none                                                                                           | diabetes mellitus                                                                 | unidentified lactobacilli                       | [21]      |
|                      | 62 male           | treatment with Nivolumab                                                                       | lung cancer                                                                       | <i>L. acidophilus</i>                           | [22]      |
|                      | 46 female         | urinary tract infection (UTI),<br>polysubstance abuse                                          | diabetes mellitus                                                                 | <i>L. acidophilus</i> *                         | [23]      |
|                      | Neonate female    | preterm birth<br>peripherally inserted central catheter (PICC) and administration of Dicoflor® |                                                                                   | <i>L. rhamnosus</i> *                           | [24]      |
|                      | 2 neonates, males | PICC, use of Dicoflor® in the same room                                                        |                                                                                   | <i>L. rhamnosus</i> *                           | [24]      |
| Endocarditis         | 39 male           | bioprosthetic aortic valve;<br>intravenous drug abuse                                          |                                                                                   | unidentified lactobacilli                       | [14]      |
|                      | 65 male           | bioprosthetic aortic valve;<br>dental extraction                                               |                                                                                   | <i>L. paracasei</i> *                           | [15]      |
|                      | 75 female         | bioprosthetic aortic valve                                                                     | Birt-Hogg-Dube syndrome                                                           | <i>L. paracasei</i>                             | [16]      |
|                      | 75 female         | septic shock from acute cholecistitis;<br>prosthetic aortic valve                              | Birt-Hogg-Dube Syndrome                                                           | <i>L. paracasei</i>                             | [17]      |
|                      | 74 male           | bioprosthetic aortic valve;<br>probiotic consumption                                           |                                                                                   | unidentified lactobacilli                       | [18]      |
|                      | 72 male           | prosthetic valve                                                                               | diabetes mellitus; stage II<br>chronic kidney disease;<br>coronary artery disease | unidentified lactobacilli                       | [19]      |
| Meningo-encephalitis | 63 male           |                                                                                                |                                                                                   | <i>L. plantarum</i>                             | [46]      |
| Septic shock         | 54 male           | consumption of probiotic yogurt                                                                | promyelocytic leukemia in<br>second complete remission                            | <i>L. rhamnosus</i> GG <sup>+</sup>             | [47]      |
| UTI                  | 49 male           |                                                                                                | none                                                                              | <i>L. delbrueckii</i> subsp. <i>delbrueckii</i> | [48]      |

|                        |           |                                                               |                                                            |                              |      |
|------------------------|-----------|---------------------------------------------------------------|------------------------------------------------------------|------------------------------|------|
| Perinephric abscess    | 52 male   |                                                               | diabetes mellitus, obesity, mild hydronephrosis            | unidentified lactobacilli    | [49] |
| <b>2020</b>            |           |                                                               |                                                            |                              |      |
| Bacteremia             | 75 male   | dental scaling; immunosuppression for renal transplantation   | diabetes mellitus                                          | <i>L. rhamnosus</i> †        | [35] |
| Endocarditis           | 42 male   | bioprosthetic aortic valve; history of IV drug use            | diabetes mellitus                                          | <i>L. acidophilus</i>        | [25] |
|                        | 48 male   | bioprosthetic valve                                           |                                                            | <i>L. plantarum</i>          | [26] |
|                        | 57 male   | teeth scaling one year earlier, heart surgery in 2003         |                                                            | <i>L. rhamnosus</i> *        | [27] |
|                        | 50 male   | gingival laceration, probiotic use                            | possible undiagnosed structural heart disease              | <i>L. rhamnosus</i> *        | [28] |
|                        | 60 male   | dental caries                                                 |                                                            | <i>L. acidophilus</i>        | [29] |
|                        | 45 male   | consumption of probiotic yogurt                               | gastroesophageal reflux                                    | <i>L. paracasei</i> †        | [30] |
|                        | 57 female | asymptomatic ureteric obstruction by calculi                  | diabetes mellitus, hypertension                            | <i>L. jensenii</i>           | [31] |
|                        | 60 male   | none                                                          | diabetes mellitus, Erdheim-Chester disease on chemotherapy | <i>L. rhamnosus</i>          | [32] |
|                        | 40 male   | past use of illicit drugs; smoking; poor dentation and caries | diabetes mellitus                                          | <i>L. rhamnosus</i>          | [33] |
| Interstitial pneumonia | 83 male   | prosthetic valve; recent upper endoscopy                      | pancytopenia; cirrhosis; Crohn's disease                   | Unidentified lactobacilli    | [34] |
|                        | 68 female | <i>L. paraplantarum</i> probiotic supplementation             | pancreatic cancer; diabetes mellitus                       | No cultures were carried out | [50] |

|                                 |                |                                                                    |                                                                                     |                                                                  |      |
|---------------------------------|----------------|--------------------------------------------------------------------|-------------------------------------------------------------------------------------|------------------------------------------------------------------|------|
| Lung abscess                    | 14 male        | possible aspiration of lactobacilli from yogurt                    | cerebral palsy, epilepsy and asthma treated with corticosteroids                    | <i>L. rhamnosus</i>                                              | [51] |
| Renal and perinephric abscesses | 26 female      | interventions to treat nephrolithiasis                             |                                                                                     | <i>L. jensenii</i> * (association with <i>Prevotella bivia</i> ) | [52] |
| Prosthetic joint infection      | 82 female      | hip arthroplasty                                                   | nephrectomy 16 years earlier, asthma, hypertension, dyslipidemia and hypothyroidism | <i>L. paracasei</i>                                              | [53] |
| <b>2021</b>                     |                |                                                                    |                                                                                     |                                                                  |      |
| Bacteremia                      | 35 male        | consumption of self made yogurt                                    | Crohn's disease, HIV-infection                                                      | unidentified lactobacilli                                        | [42] |
|                                 | 72 female      | consumption of Nukazuke, a type of fermented vegetable preparation | mild hypertension, colon adenocarcinoma                                             | <i>L. plantarum</i> *†                                           | [43] |
|                                 | Neonate male   | treatment with a probiotic                                         | aortic coarctation                                                                  | <i>L. rhamnosus</i> GG (ATCC 53103)                              | [44] |
|                                 | Neonate female | pre-term birth, CVC, treatment with a probiotic                    | none                                                                                | <i>L. rhamnosus</i> GG (ATCC 53103)* 45. Chiang et al. (2021)    | [45] |
| Endocarditis                    | 47 male        |                                                                    | cardiac disease                                                                     | <i>L. paracasei</i> LP10266+                                     | [36] |
|                                 | 81 male        | transcatheter aortic valve implantation                            |                                                                                     | <i>L. rhamnosus</i> *†                                           | [37] |
|                                 | 83 female      |                                                                    |                                                                                     | <i>L. rhamnosus</i> *†                                           | [37] |
|                                 | 55 female      |                                                                    | bicuspid aortic valve                                                               | <i>L. jensenii</i>                                               | [38] |
|                                 | 47 male        |                                                                    |                                                                                     | unidentified lactobacilli                                        | [39] |
|                                 | 40 male        | mitral valve repair                                                | none                                                                                | <i>L. jensenii</i> *+                                            | [40] |
|                                 | 71 male        | recent coronary artery stent placement                             | hypertension; obstructive sleep apnoea                                              | <i>L. rhamnosus</i>                                              | [41] |
| Masticator abscess              | 23 female      | wisdom tooth extraction,                                           | diabetes mellitus                                                                   | unidentified lactobacilli                                        | [54] |
| Prostatic abscess               | 57 male        |                                                                    | diabetes mellitus                                                                   | <i>L. jensenii</i> †                                             | [55] |
|                                 |                |                                                                    | hypertension                                                                        |                                                                  |      |
|                                 |                |                                                                    | acute renal dysfunction                                                             |                                                                  |      |
| Liver abscesses                 | 59 male        | multiple abdominal surgeries with modified biodigestive anatomy    | diabetes mellitus                                                                   | <i>L. gasseri</i> *                                              | [56] |

|                                                          |           |                                    |                                                |      |
|----------------------------------------------------------|-----------|------------------------------------|------------------------------------------------|------|
| Pancreatic<br>necrosis and<br>retroperitoneal<br>abscess | 88 female | diabetes mellitus,<br>hypertension | <i>L. paracasei</i>                            | [57] |
| Cavernosal<br>abscess                                    | 63 male   | diabetes mellitus                  | <i>L. gasseri</i> *<br><i>L. paragasseri</i> ‡ | [58] |

---

\*identified by MALDI TOF mass spectrometry and/or standarzized colorimetric methods;

†identified by PCR;

‡identified by 16S rRNA gene sequencing;

†identified by genome sequencing.
